# Supplementary material for: Eatwell Guide: modelling the dietary and cost implications of incorporating new sugar and fibre guidelines
Source: PubMed Central journal article supplement (PMC5223664; doi:10.1136/bmjopen-2016-013182), 2016-12-21
Supplement: bmjopen-2016-013182supp_appendix2.pdf [file bmjopen-2016-013182supp_appendix2.pdf]

**Appendix 2: Amount consumed (in grams) by NDNS sub-food group.**

| Main food group code | Main food group description      | Sub-food group code | Sub-food group description                        | Current average diet (g/person/d) | Old recommendations (g/person/d) | Eatwell Guide (g/person/d) |
|----------------------|----------------------------------|---------------------|---------------------------------------------------|-----------------------------------|----------------------------------|----------------------------|
| 1                    | PASTA RICE AND OTHER CEREALS     | 1C                  | PIZZA                                             | 11.8                              | 12.5                             | 11.3                       |
| 1                    | PASTA RICE AND OTHER CEREALS     | 1D                  | PASTA MANUFACTURED PRODUCTS & READY MEALS         | 5.9                               | 6.1                              | 5.5                        |
| 1                    | PASTA RICE AND OTHER CEREALS     | 1E                  | OTHER PASTA INCLUDING HOMEMADE DISHES             | 19.3                              | 21.0                             | 29.7                       |
| 1                    | PASTA RICE AND OTHER CEREALS     | 1F                  | RICE MANUFACTURED PRODUCTS & READY MEALS          | 2.4                               | 3.3                              | 2.4                        |
| 1                    | PASTA RICE AND OTHER CEREALS     | 1G                  | OTHER RICE INCLUDING HOMEMADE DISHES              | 24.7                              | 24.4                             | 25.6                       |
| 1                    | PASTA RICE AND OTHER CEREALS     | 1R                  | OTHER CEREALS                                     | 8.3                               | 11.5                             | 10.7                       |
| 2                    | WHITE BREAD                      | 2R                  | WHITE BREAD (NOT HIGH FIBRE; NOT MULTISEED BREAD) | 49.5                              | 50.9                             | 67.6                       |
| 3                    | WHOLEMEAL BREAD                  | 3R                  | WHOLEMEAL BREAD                                   | 18.3                              | 27.7                             | 53.7                       |
| 4                    | OTHER BREAD                      | 4R                  | OTHER BREAD                                       | 2.9                               | 8.1                              | 3.4                        |
| 5                    | HIGH FIBRE BREAKFAST CEREALS     | 5R                  | WHOLEGRAIN & HIGH FIBRE BR'FAST CEREALS           | 19.4                              | 26.8                             | 49.7                       |
| 6                    | OTHER BREAKFAST CEREALS          | 6R                  | OTHER BREAKFAST CEREALS (NOT HIGH FIBRE)          | 5.6                               | 8.1                              | 5.1                        |
| 7                    | BISCUITS                         | 7A                  | BISCUITS MANUFACTURED / RETAIL                    | 12.3                              | 16.3                             | 6.3                        |
| 7                    | BISCUITS                         | 7B                  | BISCUITS HOMEMADE                                 | 0.1                               | 0.1                              | 0.1                        |
| 8                    | BUNS CAKES PASTRIES & FRUIT PIES | 8B                  | FRUIT PIES MANUFACTURED                           | 1.3                               | 3.3                              | 1.3                        |
| 8                    | BUNS CAKES PASTRIES & FRUIT PIES | 8C                  | FRUIT PIES HOMEMADE                               | 0.4                               | 0.5                              | 0.4                        |
| 8                    | BUNS CAKES PASTRIES & FRUIT PIES | 8D                  | BUNS CAKES & PASTRIES MANUFACTURED                | 13.1                              | 14.1                             | 3.1                        |
| 8                    | BUNS CAKES PASTRIES & FRUIT PIES | 8E                  | BUNS CAKES & PASTRIES HOMEMADE                    | 3.1                               | 4.0                              | 2.4                        |
| 9                    | PUDDINGS                         | 9C                  | CEREAL BASED MILK PUDDINGS - MANUFACTURED         | 5.6                               | 4.3                              | 4.7                        |
| 9                    | PUDDINGS                         | 9D                  | CEREAL BASED MILK PUDDINGS - HOMEMADE             | 0.6                               | 0.4                              | 0.5                        |
| 9                    | PUDDINGS                         | 9E                  | SPONGE PUDDINGS - MANUFACTURED                    | 0.3                               | 0.3                              | 0.3                        |
| 9                    | PUDDINGS                         | 9F                  | SPONGE PUDDINGS - HOMEMADE                        | 0.6                               | 0.6                              | 0.6                        |
| 9                    | PUDDINGS                         | 9G                  | OTHER CEREAL BASED PUDDINGS - MANUFACTURED        | 2.2                               | 3.8                              | 2.1                        |
| 9                    | PUDDINGS                         | 9H                  | OTHER CEREAL BASED PUDDINGS - HOMEMADE            | 2.9                               | 3.1                              | 2.6                        |
| 10                   | WHOLE MILK                       | 10R                 | WHOLE MILK                                        | 31.3                              | 29.8                             | 13.7                       |
| 11                   | SEMI SKIMMED MILK                | 11R                 | SEMI SKIMMED MILK                                 | 100.5                             | 99.1                             | 111.4                      |
| 12                   | SKIMMED MILK                     | 12R                 | SKIMMED MILK                                      | 19.9                              | 18.6                             | 15.5                       |

| Main food group code | Main food group description             | Sub-food group code | Sub-food group description                         | Current average diet (g/person/d) | Old recommendations (g/person/d) | Eatwell Guide (g/person/d) |
|----------------------|-----------------------------------------|---------------------|----------------------------------------------------|-----------------------------------|----------------------------------|----------------------------|
| 13                   | OTHER MILK AND CREAM                    | 13B                 | CREAM (INCLUDING IMITATION CREAM)                  | 2.8                               | 0.5                              | 1.9                        |
| 13                   | OTHER MILK AND CREAM                    | 13R                 | OTHER MILK                                         | 10.2                              | 8.8                              | 6.9                        |
| 14                   | CHEESE                                  | 14A                 | COTTAGE CHEESE                                     | 0.5                               | 0.2                              | 0.5                        |
| 14                   | CHEESE                                  | 14B                 | CHEDDAR CHEESE                                     | 3.2                               | 0.0                              | 1.2                        |
| 14                   | CHEESE                                  | 14R                 | OTHER CHEESE                                       | 12.6                              | 3.0                              | 0.0                        |
| 15                   | YOGURT FROMAGE FRAIS AND DAIRY DESSERTS | 15B                 | YOGURT                                             | 27.3                              | 26.2                             | 12.1                       |
| 15                   | YOGURT FROMAGE FRAIS AND DAIRY DESSERTS | 15C                 | FROMAGE FRAIS AND DAIRY DESSERTS MANUFACTURED      | 1.7                               | 0.9                              | 1.6                        |
| 15                   | YOGURT FROMAGE FRAIS AND DAIRY DESSERTS | 15D                 | DAIRY DESSERTS HOMEMADE                            | 0.2                               | 0.2                              | 0.2                        |
| 16                   | EGGS AND EGG DISHES                     | 16C                 | MANUFACTURED EGG PRODUCTS INCLUDING READY MEALS    | 2.6                               | 1.5                              | 2.3                        |
| 16                   | EGGS AND EGG DISHES                     | 16D                 | OTHER EGGS AND EGG DISHES INCLUDING HOMEMADE       | 16.1                              | 10.9                             | 0.0                        |
| 17                   | BUTTER                                  | 17R                 | BUTTER                                             | 4.1                               | 0.6                              | 0.2                        |
| 18                   | PUFA MARGARINE & OILS                   | 18A                 | POLYUNSATURATED MARGARINE                          | 0.0                               | 0.0                              | 0.0                        |
| 18                   | PUFA MARGARINE & OILS                   | 18B                 | POLYUNSATURATED OILS                               | 0.4                               | 0.2                              | 0.4                        |
| 19                   | LOW FAT SPREAD                          | 19A                 | POLYUNSATURATED LOW FAT SPREAD                     | 1.2                               | 0.6                              | 1.0                        |
| 19                   | LOW FAT SPREAD                          | 19R                 | LOW FAT SPREAD NOT POLYUNSATURATED                 | 0.4                               | 0.3                              | 0.3                        |
| 20                   | OTHER MARGARINE FATS AND OILS           | 20A                 | BLOCK MARGARINE                                    | 0.1                               | 0.1                              | 0.1                        |
| 20                   | OTHER MARGARINE FATS AND OILS           | 20B                 | SOFT MARGARINE NOT POLYUNSATURATED                 | 0.0                               | 0.0                              | 0.0                        |
| 20                   | OTHER MARGARINE FATS AND OILS           | 20C                 | OTHER COOKING FATS AND OILS NOT PUFA               | 1.3                               | 0.0                              | 1.0                        |
| 21                   | REDUCED FAT SPREAD                      | 21A                 | REDUCED FAT SPREAD (POLYUNSATURATED)               | 1.6                               | 0.2                              | 1.2                        |
| 21                   | REDUCED FAT SPREAD                      | 21B                 | REDUCED FAT SPREAD (NOT POLYUNSATURATED)           | 5.0                               | 2.4                              | 1.1                        |
| 22                   | BACON AND HAM                           | 22A                 | READY MEALS / MEAL CENTRES BASED ON BACON AND HAM  | 0.0                               | 0.0                              | 0.0                        |
| 22                   | BACON AND HAM                           | 22B                 | OTHER BACON AND HAM INCLUDING HOMEMADE DISHES      | 14.4                              | 5.6                              | 0.0                        |
| 23                   | BEEF VEAL AND DISHES                    | 23A                 | MANUFACTURED BEEF PRODUCTS INCLUDING READY MEALS   | 5.8                               | 5.5                              | 5.6                        |
| 23                   | BEEF VEAL AND DISHES                    | 23B                 | OTHER BEEF & VEAL INCLUDING HOMEMADE RECIPE DISHES | 20.5                              | 11.5                             | 0.0                        |
| 24                   | LAMB AND DISHES                         | 24A                 | MANUFACTURED LAMB PRODUCTS INCLUDING READY MEALS   | 1.3                               | 1.5                              | 1.3                        |
| 24                   | LAMB AND DISHES                         | 24B                 | OTHER LAMB INCLUDING HOMEMADE RECIPE DISHES        | 7.4                               | 0.0                              | 2.4                        |
| 25                   | PORK AND DISHES                         | 25A                 | MANUFACTURED PORK PRODUCTS INCLUDING READY MEALS   | 0.5                               | 0.2                              | 0.5                        |
| 25                   | PORK AND DISHES                         | 25B                 | OTHER PORK INCLUDING HOMEMADE RECIPE DISHES        | 7.3                               | 0.0                              | 2.1                        |

| Main food group code | Main food group description              | Sub-food group code | Sub-food group description                          | Current average diet (g/person/d) | Old recommendations (g/person/d) | Eatwell Guide (g/person/d) |
|----------------------|------------------------------------------|---------------------|-----------------------------------------------------|-----------------------------------|----------------------------------|----------------------------|
| 26                   | COATED CHICKEN                           | 26A                 | MANUFACTURED COATED CHICKEN / TURKEY PRODUCTS       | 5.5                               | 1.1                              | 3.5                        |
| 27                   | CHICKEN AND TURKEY DISHES                | 27A                 | MANUFACTURED CHICKEN PRODUCTS INCL READY MEALS      | 7.8                               | 5.1                              | 5.6                        |
| 27                   | CHICKEN AND TURKEY DISHES                | 27B                 | OTHER CHICKEN / TURKEY INCL HOMEMADE RECIPE DISHES  | 32.7                              | 23.8                             | 0.0                        |
| 28                   | LIVER & DISHES                           | 28R                 | LIVER AND DISHES                                    | 1.5                               | 0.0                              | 1.3                        |
| 29                   | BURGERS AND KEBABS                       | 29R                 | BURGERS AND KEBABS PURCHASED                        | 5.7                               | 1.4                              | 3.6                        |
| 30                   | SAUSAGES                                 | 30A                 | READY MEALS BASED ON SAUSAGES                       | 0.1                               | 0.1                              | 0.1                        |
| 30                   | SAUSAGES                                 | 30B                 | OTHER SAUSAGES INCLUDING HOMEMADE DISHES            | 11.5                              | 8.8                              | 2.4                        |
| 31                   | MEAT PIES AND PASTRIES                   | 31A                 | MANUFACTURED MEAT PIES AND PASTRIES                 | 7.4                               | 7.7                              | 5.5                        |
| 31                   | MEAT PIES AND PASTRIES                   | 31B                 | HOMEMADE MEAT PIES AND PASTRIES                     | 1.6                               | 0.0                              | 1.5                        |
| 32                   | OTHER MEAT AND MEAT PRODUCTS             | 32A                 | OTHER MEAT PRODUCTS MANUFACTURED Â INCL READY MEALS | 3.3                               | 0.0                              | 1.9                        |
| 32                   | OTHER MEAT AND MEAT PRODUCTS             | 32B                 | OTHER MEAT Â INCLUDING HOMEMADE RECIPE DISHES       | 1.9                               | 0.0                              | 1.6                        |
| 33                   | WHITE FISH COATED OR FRIED               | 33R                 | WHITE FISH COATED OR FRIED                          | 9.3                               | 11.0                             | 14.1                       |
| 34                   | OTHER WHITE FISH SHELLFISH & FISH DISHES | 34C                 | MANUFACTURED WHITE FISH PRODUCTS INCL READY MEALS   | 0.8                               | 1.2                              | 0.8                        |
| 34                   | OTHER WHITE FISH SHELLFISH & FISH DISHES | 34D                 | OTHER WHITE FISH INCLUDING HOMEMADE DISHES          | 5.2                               | 6.8                              | 8.1                        |
| 34                   | OTHER WHITE FISH SHELLFISH & FISH DISHES | 34E                 | MANUFACTURED SHELLFISH PRODUCTS INCL READY MEALS    | 0.6                               | 0.7                              | 0.7                        |
| 34                   | OTHER WHITE FISH SHELLFISH & FISH DISHES | 34F                 | OTHER SHELLFISH INCLUDING HOMEMADE DISHES           | 3.3                               | 5.8                              | 4.2                        |
| 34                   | OTHER WHITE FISH SHELLFISH & FISH DISHES | 34G                 | MANUFACTURED CANNED TUNA PRODUCTS INCL READY MEALS  | 2.8                               | 2.3                              | 3.4                        |
| 34                   | OTHER WHITE FISH SHELLFISH & FISH DISHES | 34H                 | OTHER CANNED TUNA INCLUDING HOMEMADE DISHES         | 1.7                               | 1.5                              | 1.9                        |
| 35                   | OILY FISH                                | 35A                 | MANUFACTURED OILY FISH PRODUCTS INCL READY MEALS    | 3.6                               | 8.9                              | 9.2                        |
| 35                   | OILY FISH                                | 35B                 | OTHER OILY FISH INCLUDING HOMEMADE DISHES           | 6.4                               | 14.3                             | 32.3                       |
| 36                   | SALAD AND OTHER RAW VEGETABLES           | 36A                 | CARROTS RAW                                         | 2.1                               | 8.0                              | 2.6                        |
| 36                   | SALAD AND OTHER RAW VEGETABLES           | 36B                 | SALAD AND OTHER RAW VEGETABLES                      | 23.9                              | 26.5                             | 46.2                       |
| 36                   | SALAD AND OTHER RAW VEGETABLES           | 36C                 | TOMATOES RAW                                        | 18.5                              | 20.2                             | 30.0                       |
| 37                   | VEGETABLES NOT RAW                       | 37A                 | PEAS NOT RAW                                        | 9.0                               | 16.8                             | 18.4                       |
| 37                   | VEGETABLES NOT RAW                       | 37B                 | GREEN BEANS NOT RAW                                 | 3.6                               | 11.3                             | 5.1                        |
| 37                   | VEGETABLES NOT RAW                       | 37C                 | BAKED BEANS                                         | 15.8                              | 23.3                             | 35.0                       |
| 37                   | VEGETABLES NOT RAW                       | 37D                 | LEAFY GREEN VEGETABLES NOT RAW                      | 13.7                              | 17.4                             | 24.9                       |
| 37                   | VEGETABLES NOT RAW                       | 37E                 | CARROTS NOT RAW                                     | 13.2                              | 18.4                             | 26.1                       |

| Main food group code | Main food group description                      | Sub-food group code | Sub-food group description                         | Current average diet (g/person/d) | Old recommendations (g/person/d) | Eatwell Guide (g/person/d) |
|----------------------|--------------------------------------------------|---------------------|----------------------------------------------------|-----------------------------------|----------------------------------|----------------------------|
| 37                   | VEGETABLES NOT RAW                               | 37F                 | TOMATOES NOT RAW                                   | 12.7                              | 13.7                             | 16.5                       |
| 37                   | VEGETABLES NOT RAW                               | 37I                 | BEANS AND PULSES INCL READY MEAL & HOMEMADE DISHES | 5.3                               | 13.1                             | 8.5                        |
| 37                   | VEGETABLES NOT RAW                               | 37K                 | MEAT ALTERNATIVES INCL READY MEALS & HOMEMADE DISH | 2.0                               | 4.1                              | 2.1                        |
| 37                   | VEGETABLES NOT RAW                               | 37L                 | OTHER MANUFACTURED VEGETABLE PRODUCTS INCL RM      | 2.3                               | 4.4                              | 2.4                        |
| 37                   | VEGETABLES NOT RAW                               | 37M                 | OTHER VEGETABLES INCLUDING HOMEMADE DISHES         | 45.8                              | 50.0                             | 93.6                       |
| 38                   | CHIPS FRIED & ROAST POTATOES AND POTATO PRODUCTS | 38A                 | CHIPS PURCHASED INCLUDING TAKEAWAY                 | 17.5                              | 22.5                             | 32.7                       |
| 38                   | CHIPS FRIED & ROAST POTATOES AND POTATO PRODUCTS | 38C                 | OTHER MANUFACTURED POTATO PRODUCTS FRIED/BAKED     | 3.7                               | 6.8                              | 4.0                        |
| 38                   | CHIPS FRIED & ROAST POTATOES AND POTATO PRODUCTS | 38D                 | OTHER FRIED / ROAST POTATOES INCL HOMEMADE DISHES  | 19.4                              | 22.9                             | 33.4                       |
| 39                   | OTHER POTATOES POTATO SALADS & DISHES            | 39A                 | OTHER POTATO PRODUCTS & DISHES - MANUFACTURED      | 1.9                               | 3.1                              | 2.0                        |
| 39                   | OTHER POTATOES POTATO SALADS & DISHES            | 39B                 | OTHER POTATOES INCLUDING HOMEMADE DISHES           | 50.2                              | 52.6                             | 104.3                      |
| 40                   | FRUIT                                            | 40A                 | APPLES AND PEARS NOT CANNED                        | 30.5                              | 33.4                             | 70.4                       |
| 40                   | FRUIT                                            | 40B                 | CITRUS FRUIT NOT CANNED                            | 12.4                              | 14.6                             | 18.9                       |
| 40                   | FRUIT                                            | 40C                 | BANANAS                                            | 24.8                              | 26.8                             | 48.1                       |
| 40                   | FRUIT                                            | 40D                 | CANNED FRUIT IN JUICE                              | 2.6                               | 4.6                              | 2.8                        |
| 40                   | FRUIT                                            | 40E                 | CANNED FRUIT IN SYRUP                              | 0.8                               | 1.2                              | 0.8                        |
| 40                   | FRUIT                                            | 40R                 | OTHER FRUIT NOT CANNED                             | 28.5                              | 32.0                             | 68.4                       |
| 41                   | SUGARS PRESERVES AND SWEET SPREADS               | 41A                 | SUGAR                                              | 8.8                               | 6.5                              | 0.0                        |
| 41                   | SUGARS PRESERVES AND SWEET SPREADS               | 41B                 | PRESERVES                                          | 3.6                               | 3.3                              | 1.4                        |
| 41                   | SUGARS PRESERVES AND SWEET SPREADS               | 41R                 | SWEET SPREADS FILLINGS AND ICING                   | 0.3                               | 0.3                              | 0.3                        |
| 42                   | CRISPS AND SAVOURY SNACKS                        | 42R                 | CRISPS AND SAVOURY SNACKS                          | 6.1                               | 10.2                             | 6.0                        |
| 43                   | SUGAR CONFECTIONERY                              | 43R                 | SUGAR CONFECTIONERY                                | 1.6                               | 2.4                              | 1.2                        |
| 44                   | CHOCOLATE CONFECTIONERY                          | 44R                 | CHOCOLATE CONFECTIONERY                            | 8.1                               | 8.4                              | 0.0                        |
| 45                   | FRUIT JUICE                                      | 45R                 | FRUIT JUICE                                        | 53.1                              | 53.0                             | 24.4                       |
| 50                   | MISCELLANEOUS                                    | 50A                 | BEVERAGES DRY WEIGHT                               | 2.5                               | 0.7                              | 1.7                        |
| 50                   | MISCELLANEOUS                                    | 50C                 | SOUP MANUFACTURED/ RETAIL                          | 22.6                              | 23.2                             | 18.5                       |
| 50                   | MISCELLANEOUS                                    | 50D                 | SOUP HOMEMADE                                      | 3.8                               | 4.9                              | 3.9                        |
| 50                   | MISCELLANEOUS                                    | 50R                 | SAVOURY SAUCES PICKLES GRAVIES & CONDIMENTS        | 28.9                              | 30.0                             | 3.7                        |
| 51                   | TEA COFFEE AND WATER                             | 51A                 | COFFEE (MADE-UP WEIGHT)                            | 255.9                             | 255.9                            | 252.4                      |

| Main food group code | Main food group description       | Sub-food group code | Sub-food group description               | Current average diet (g/person/d) | Old recommendations (g/person/d) | Eatwell Guide (g/person/d) |
|----------------------|-----------------------------------|---------------------|------------------------------------------|-----------------------------------|----------------------------------|----------------------------|
| 51                   | TEA COFFEE AND WATER              | 51B                 | TEA (MADE-UP WEIGHT)                     | 411.8                             | 411.8                            | 415.6                      |
| 51                   | TEA COFFEE AND WATER              | 51C                 | HERBAL TEA (MADE-UP WEIGHT)              | 22.1                              | 22.1                             | 22.1                       |
| 51                   | TEA COFFEE AND WATER              | 51D                 | BOTTLED WATER STILL OR CARBONATED        | 80.5                              | 80.5                             | 80.5                       |
| 51                   | TEA COFFEE AND WATER              | 51R                 | TAP WATER ONLY                           | 347.3                             | 347.3                            | 347.3                      |
| 53                   | ICE CREAM                         | 53R                 | ICE CREAM                                | 5.4                               | 3.7                              | 2.9                        |
| 56                   | NUTS AND SEEDS                    | 56R                 | NUTS AND SEEDS                           | 2.9                               | 7.8                              | 3.0                        |
| 57                   | SOFT DRINKS NOT LOW CALORIE       | 57A                 | SOFT DRINKS NOT LOW CALORIE CONCENTRATED | 33.9                              | 33.8                             | 17.4                       |
| 57                   | SOFT DRINKS NOT LOW CALORIE       | 57B                 | SOFT DRINKS NOT LOW CALORIE CARBONATED   | 68.1                              | 67.9                             | 31.6                       |
| 57                   | SOFT DRINKS NOT LOW CALORIE       | 57C                 | SOFT DRINKS NOT LOW CALORIE RTD STILL    | 17.9                              | 17.7                             | 10.1                       |
| 58                   | SOFT DRINKS LOW CALORIE           | 58A                 | SOFT DRINKS LOW CALORIE CONCENTRATED     | 36.1                              | 36.1                             | 35.0                       |
| 58                   | SOFT DRINKS LOW CALORIE           | 58B                 | SOFT DRINKS LOW CALORIE CARBONATED       | 46.8                              | 46.8                             | 46.6                       |
| 58                   | SOFT DRINKS LOW CALORIE           | 58C                 | SOFT DRINKS LOW CALORIE RTD STILL        | 1.7                               | 1.7                              | 1.7                        |
| 59                   | BROWN GRANARY AND WHEATGERM BREAD | 59R                 | BROWN GRANARY AND WHEATGERM BREAD        | 14.5                              | 20.7                             | 29.1                       |
| 60                   | 1% Fat Milk                       | 60R                 | 1% Fat Milk                              | 1.6                               | 0.9                              | 1.6                        |
| 61                   | SMOOTHIES 100% FRUIT AND/OR JUICE | 61R                 | SMOOTHIES 100% FRUIT AND/OR JUICE        | 0.8                               | 1.1                              | 0.8                        |
